# Supplementary material for: SUMOylation at K707 of DGCR8 controls direct function of primary microRNA
Source: PubMed Central journal article supplement (PMC4652762; doi:10.1093/nar/gkv741), 2015-07-21

# Figure S1

## A SUMOplot prediction of human DGCR8

|                    |                                                               |
|--------------------|---------------------------------------------------------------|
| <b>Protein ID:</b> | gi 38488720 ref NP_073557.3                                   |
| <b>Defintion:</b>  | microprocessor complex subunit DGCR8 isoform 1 [Homo sapiens] |
| <b>Length:</b>     | 773 aa                                                        |

|                                                                                      |                                                                                                        |
|--------------------------------------------------------------------------------------|--------------------------------------------------------------------------------------------------------|
| 1 METDESPL PCGPAGEAVM ESRARPFQAL PREQSPPPPL QTSSGAEVMD                               | <b>Motifs with high probability</b><br><b>Motifs with low probability</b><br><b>Overlapping Motifs</b> |
| 51 VGSGGDGQSE LPAEDPFNFY GASLLSKGSF SKGRLLIDPN CSGHSPRTAR                            |                                                                                                        |
| 101 HAPAVRKFSF DLKLLKDVKI SVSFTESCRS KDRKVLTYGA ERDVRAECGL                           |                                                                                                        |
| 151 LLSPVSGDVH ACPFGGSVDG GVGIGGESAD <b>KKDE</b> ENELDQ EKRVEYAVLD                   |                                                                                                        |
| 201 ELEDFTDNLE LDEEGAGGFT AKAIVQRDRV DEEALNFPYE DDFDNDVDAL                           |                                                                                                        |
| 251 LEEGLCAPKK RRTE <b>EKY</b> GGD SDHPSDGETS VQPMMTKIKT VLKSRGRPPT                  |                                                                                                        |
| 301 EPLPDGWIMT FHNSGVPVYL HRESRVVTVS RPYFLGTGSI <b>RKHD</b> PPLSSI                   |                                                                                                        |
| 351 PCLHYKMKMD NEEREQSSDL TPGGDVSPVK PLSRSAELEF PLDEPDSMGA                           |                                                                                                        |
| 401 DPGPPD <b>EKDP</b> LGAEAAPGAL GQVK <b>AKVE</b> VC KDESVDLEEF RSYL <b>EKR</b> FDF |                                                                                                        |
| 451 EQVT <b>VK</b> KFRF WAERRQFNRE MKRKQAESER PILPANQKLI TSVQDAP <b>TK</b>           |                                                                                                        |
| 501 <b>KEF</b> VINPN <b>GK</b> SEVVCILHEYM QRVLKVRPVY NFFECENPSE PFGASVTIDG          |                                                                                                        |
| 551 VTYGSGTASS KKLAKNKAAR ATLEILIPDF VKQTSEEKPK DSEELEYFNH                           |                                                                                                        |
| 601 ISTEDSRVYE LTSKAGLLSP YQILHECLKR NHGMGDT <b>SIK</b> FEVVPGKN <b>QK</b>           |                                                                                                        |
| 651 SEYVMACGKH TVRGWCKNKR VGKQLASQKI LQLLHPHVKN WGSLLRMYGR                           |                                                                                                        |
| 701 ESSKM <b>VKQ</b> ET SDKSVIELQQ YAKKNKPNLH ILSKLQEEMK RLAEEREETR                  |                                                                                                        |
| 751 <b>KK</b> FKMSIVAS AQPGEPLCT VDV                                                 |                                                                                                        |

| No. | Pos. | Group                   | Score | No. | Pos. | Group                    | Score |
|-----|------|-------------------------|-------|-----|------|--------------------------|-------|
| 1   | K640 | MGDTS <b>IKFE</b> VVPGK | 0.94  | 8   | K182 | GESAD <b>KKDE</b> ENELD  | 0.48  |
| 2   | K707 | ESSKM <b>VKQE</b> TSDKS | 0.93  | 9   | K342 | GTGSI <b>RKHD</b> PPLSS  | 0.44  |
| 3   | K426 | LGQVK <b>AKVE</b> VCKDE | 0.79  | 10  | K408 | PGPPD <b>EKDP</b> LGAEA  | 0.39  |
| 4   | K510 | VINPN <b>GKSE</b> VCILH | 0.67  | 11  | K751 | EREET <b>RKKP</b> KMSIV  | 0.34  |
| 5   | K456 | FEQVT <b>VKKF</b> RTWAE | 0.58  | 12  | K266 | KRRTE <b>EKYG</b> GDS DH | 0.33  |
| 6   | K650 | VPGKN <b>QKSE</b> YVMAC | 0.5   | 13  | K446 | FRSYL <b>EKRF</b> DFEQV  | 0.15  |
| 7   | K181 | GGESA <b>DKKD</b> EENEL | 0.5   | 14  | K501 | QDAPT <b>KKEF</b> VINPN  | 0.13  |

## B

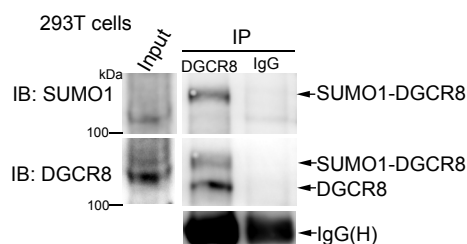

## C

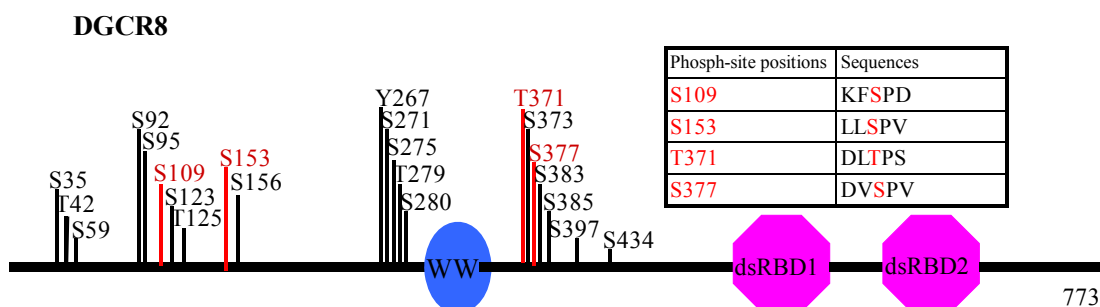

*Mut4*:S109A/S153V/T371A/S377V

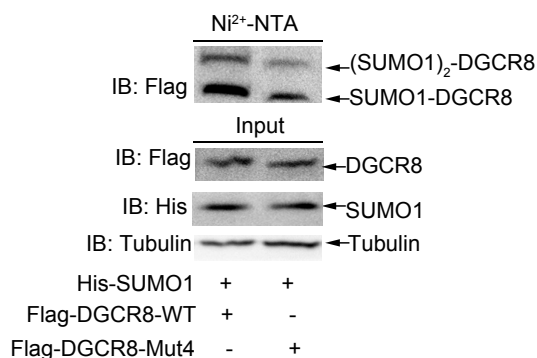

Supplement: supp_gkv741_nar-00407-y-2015-File010.pdf [file supp_gkv741_nar-00407-y-2015-File010.pdf]
