# Supplementary material for: SUMOylation at K707 of DGCR8 controls direct function of primary microRNA
Source: PubMed Central journal article supplement (PMC4652762; doi:10.1093/nar/gkv741), 2015-07-21

# Figure S2

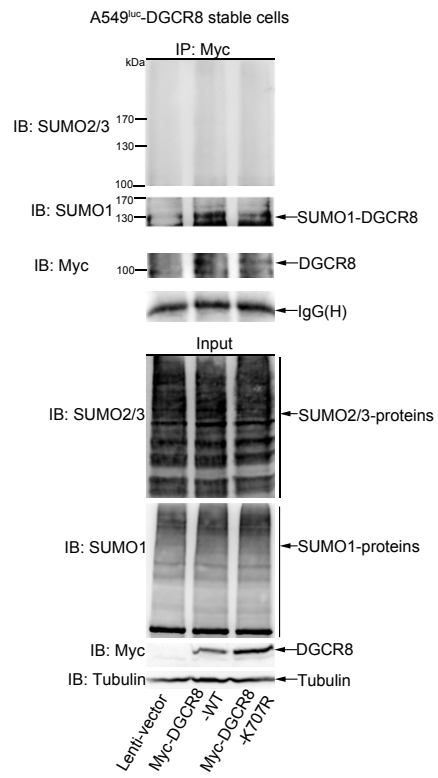

Supplement: supp_gkv741_nar-00407-y-2015-File011.pdf [file supp_gkv741_nar-00407-y-2015-File011.pdf]
