# Supplementary material for: SUMOylation at K707 of DGCR8 controls direct function of primary microRNA
Source: PubMed Central journal article supplement (PMC4652762; doi:10.1093/nar/gkv741), 2015-07-21

# Figure S4

A

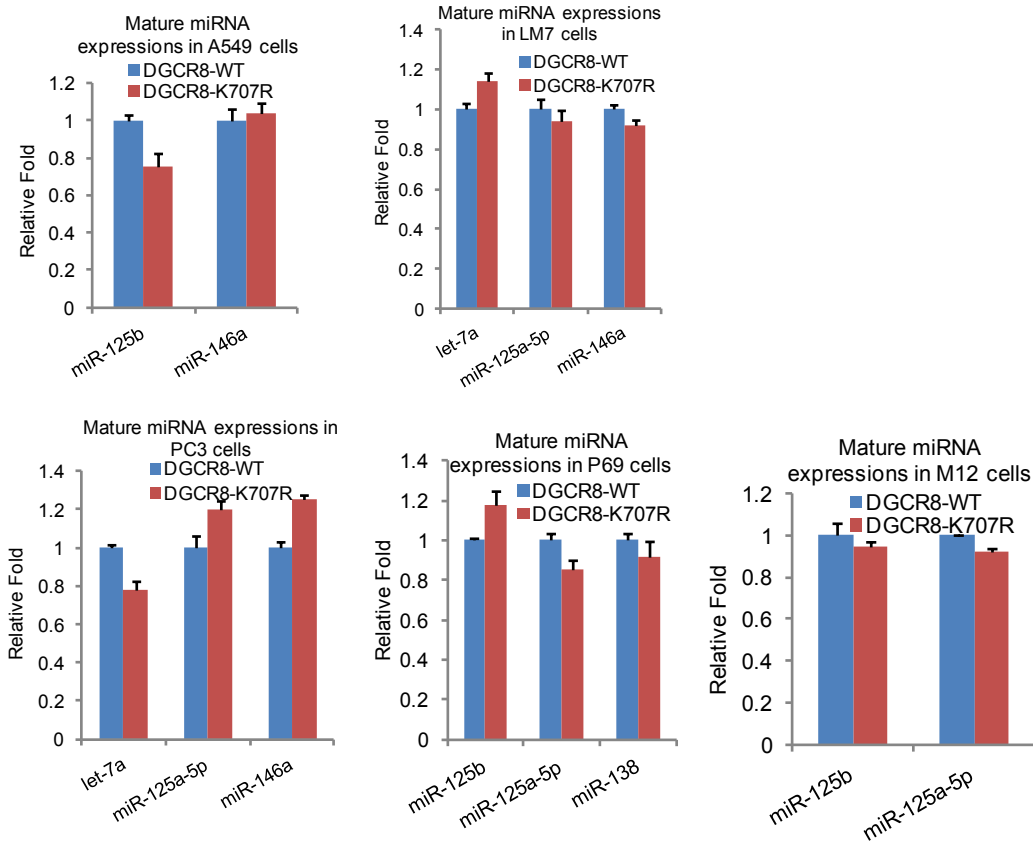

B

*psiCHECK-2 Vector*

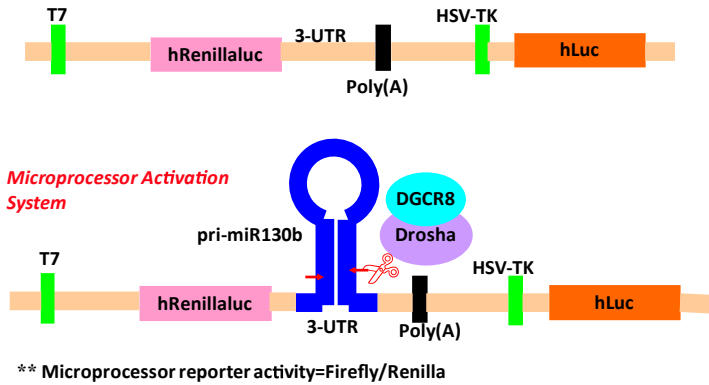

C

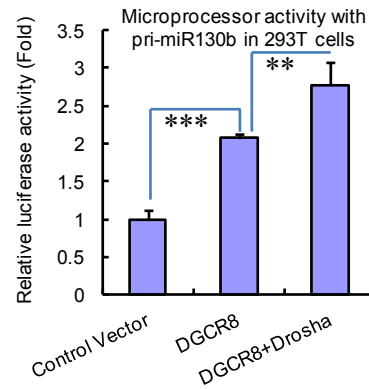

Supplement: supp_gkv741_nar-00407-y-2015-File013.pdf [file supp_gkv741_nar-00407-y-2015-File013.pdf]
